# Supplementary material
Source: MDPI journal article supplement (https://www.mdpi.com/2073-4352/12/1/96)
Supplement: s1 [file s1]

Archive with 1 entries (1 files):
- crystals-1526077-supplementary.pdf
